# Supplementary material
Source: Springer Nature journal article supplement (https://www.springermedizin.de/resource/supplementary/13049_2012_561_MOESM3_ESM.pdf/9666820)

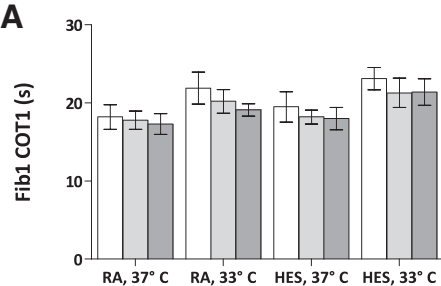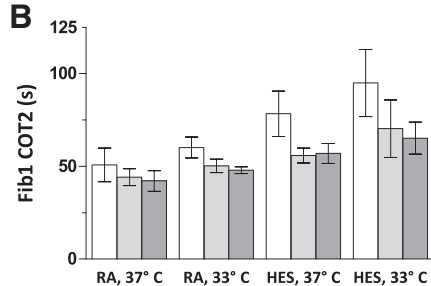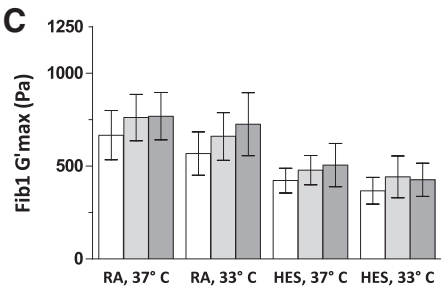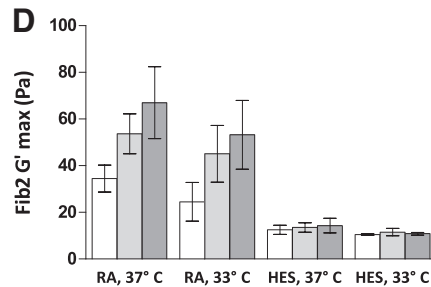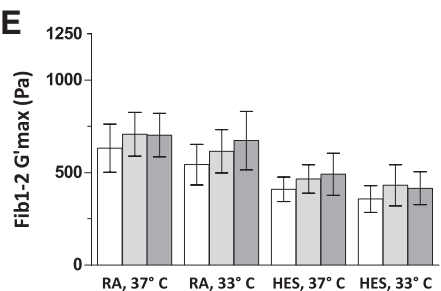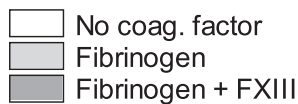

Supplement: MOESM3 [file 9666820]
